# Supplementary material
Source: HighWire-hosted journal article supplement (https://bmjopen.bmj.com/content/9/7/e028227)
Supplement: inline-supplementary-material-1 [file inline-supplementary-material-1.pdf]

Supplementary material

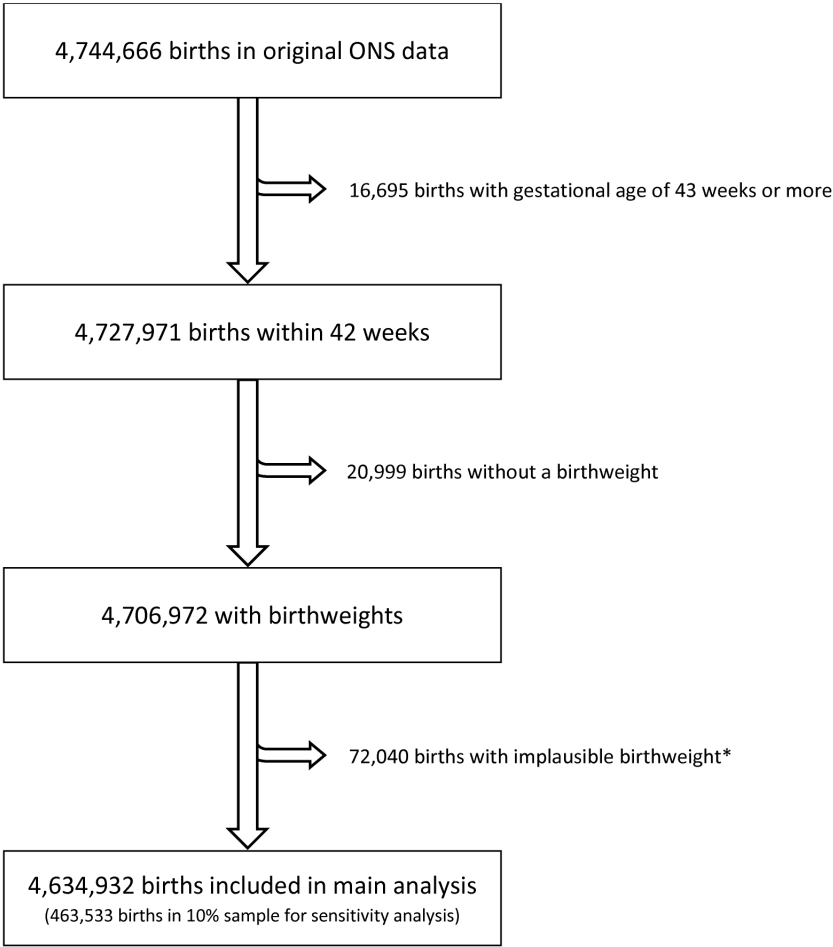

\* A birthweight is considered implausible if it exceeds twice the interquartile range above and below the sex, gestation and ethnic group-specific median weight

Supplementary figure 1: Sample profile of the infants included in the analysis, England and Wales, births 2006 – 2012

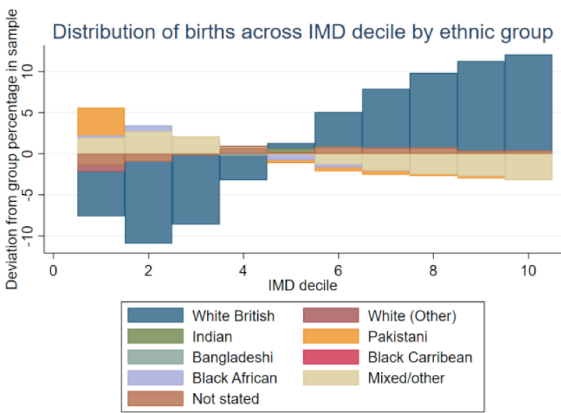

Supplementary figure 2: Distribution of births in each ethnic group and IMD relative to the ethnic group proportion of births, England and Wales, births 2006 – 2012

*Supplementary table 1: Risks of adverse birth outcomes across ethnic groups and NS-SEC classification in the 10% sample of births, England and Wales, births 2006 – 2012*

| Ethnic group               | Risk of outcome                 |                               |                    |
|----------------------------|---------------------------------|-------------------------------|--------------------|
|                            | Neonatal mortality<br>per 1,000 | Infant mortality<br>per 1,000 | Preterm birth<br>% |
| White British              | 1.8                             | 2.8                           | 5.6                |
| White (other)              | 1.7                             | 2.4                           | 4.7                |
| Indian                     | 2.6                             | 3.8                           | 5.6                |
| Pakistani                  | 4.0                             | 6.9                           | 6.0                |
| Bangladeshi                | 2.4                             | 4.4                           | 5.9                |
| Black Caribbean            | 3.9                             | 6.4                           | 8.2                |
| Black African              | 4.1                             | 5.8                           | 6.3                |
| Mixed/other                | 2.3                             | 3.7                           | 5.7                |
| Not stated                 | 2.5                             | 3.8                           | 5.5                |
| NS-SEC classification      |                                 |                               |                    |
| 9 never worked, unemployed | 3.4                             | 5.4                           | 7.4                |
| 8 routine occupations      | 2.5                             | 4.1                           | 6.4                |
| 7 semi-routine occupations | 2.6                             | 4.3                           | 6.2                |
| 6 lower supervisory        | 2.0                             | 3.0                           | 5.8                |
| 5 small employers          | 2.0                             | 3.5                           | 5.5                |
| 4 intermediate occupations | 2.3                             | 3.4                           | 5.6                |
| 3 lower managerial         | 1.8                             | 2.6                           | 5.1                |
| 2 higher professional      | 1.8                             | 2.4                           | 4.7                |
| 1 large employers          | 1.5                             | 2.1                           | 4.7                |
| <b>Overall</b>             | <b>2.1</b>                      | <b>3.3</b>                    | <b>5.6</b>         |

*Supplementary table 2: Slope and relative indices of inequality (with bootstrap 95% confidence intervals) in the 10% sample of births, England and Wales, births 2006 – 2012*

| Index of inequality across NS-SEC | Neonatal mortality<br>per 1,000 | Infant mortality<br>per 1,000 | Preterm birth<br>%    |
|-----------------------------------|---------------------------------|-------------------------------|-----------------------|
|                                   |                                 |                               |                       |
| Slope index                       | 1.41<br>(0.97 – 1.85)           | 2.71<br>(2.14 – 3.28)         | 2.33<br>(2.08 – 2.57) |
| Relative index                    | 1.86<br>(1.46 – 2.26)           | 2.19<br>(1.78 – 2.59)         | 1.49<br>(1.42 – 1.56) |

Supplementary table 3: Differences in risks of adverse birth outcomes across ethnic groups, England and Wales, births 2006 – 2012

| Ethnic group                                                                                                                                                                                                | Difference in risk of outcome (95% CI) |                    |                            |                    |                    |                    |
|-------------------------------------------------------------------------------------------------------------------------------------------------------------------------------------------------------------|----------------------------------------|--------------------|----------------------------|--------------------|--------------------|--------------------|
|                                                                                                                                                                                                             | Neonatal mortality per 1,000           |                    | Infant mortality per 1,000 |                    | Preterm birth %    |                    |
|                                                                                                                                                                                                             | Unadjusted                             | Adjusted           | Unadjusted                 | Adjusted           | Unadjusted         | Adjusted           |
| White British                                                                                                                                                                                               | [comparison group]                     | [comparison group] | [comparison group]         | [comparison group] | [comparison group] | [comparison group] |
| White (other)                                                                                                                                                                                               | -0.2 (-0.3 – -0.1)                     | -0.3 (-0.4 – -0.1) | -0.4 (-0.6 – -0.2)         | -0.5 (-0.7 – -0.3) | -0.9 (-1.0 – -0.8) | -1.0 (-1.1 – -0.9) |
| Indian                                                                                                                                                                                                      | 0.5 (0.3 – 0.8)                        | 0.4 (0.2 – 0.7)    | 0.7 (0.4 – 1.0)            | 0.6 (0.2 – 0.9)    | 0.5 (0.4 – 0.6)    | 0.3 (0.2 – 0.5)    |
| Pakistani                                                                                                                                                                                                   | 2.2 (2.0 – 2.4)                        | 1.9 (1.7 – 2.1)    | 4.0 (3.8 – 4.3)            | 3.5 (3.2 – 3.8)    | 0.5 (0.4 – 0.6)    | -0.1 (-0.2 – 0.0)  |
| Bangladeshi                                                                                                                                                                                                 | 0.9 (0.5 – 1.2)                        | 0.5 (0.2 – 0.9)    | 1.5 (1.1 – 2.0)            | 0.9 (0.5 – 1.4)    | 0.8 (0.6 – 0.9)    | 0.2 (-0.0 – 0.3)   |
| Black Caribbean                                                                                                                                                                                             | 2.2 (1.7 – 2.6)                        | 1.9 (1.5 – 2.3)    | 3.1 (2.6 – 3.6)            | 2.6 (2.1 – 3.1)    | 2.7 (2.5 – 2.9)    | 2.2 (1.9 – 2.4)    |
| Black African                                                                                                                                                                                               | 1.5 (1.3 – 1.8)                        | 1.2 (1.0 – 1.5)    | 2.3 (2.0 – 2.6)            | 1.8 (1.5 – 2.1)    | 0.6 (0.5 – 0.8)    | 0.1 (0.0 – 0.3)    |
| Mixed/other                                                                                                                                                                                                 | 0.3 (0.2 – 0.4)                        | 0.2 (0.0 – 0.3)    | 0.5 (0.4 – 0.7)            | 0.3 (0.1 – 0.5)    | 0.1 (0.0 – 0.2)    | -0.1 (-0.2 – -0.1) |
| Not stated                                                                                                                                                                                                  | 0.6 (0.4 – 0.8)                        | 0.6 (0.4 – 0.8)    | 0.7 (0.5 – 0.9)            | 0.6 (0.4 – 0.9)    | 0.1 (0.0 – 0.2)    | 0.1 (-0.0 – 0.2)   |
| Unadjusted difference in risk of outcomes represent the total effect (path c) of ethnic group on birth outcomes; differences adjusted for socioeconomic circumstances represent the direct effect (path c') |                                        |                    |                            |                    |                    |                    |
